# Supplementary material for: Olive Polyphenols and the Metabolic Syndrome
Source: MDPI journal article supplement (doi:10.3390/molecules22071082), 2017-06-29
Supplement: s1 [file s1]

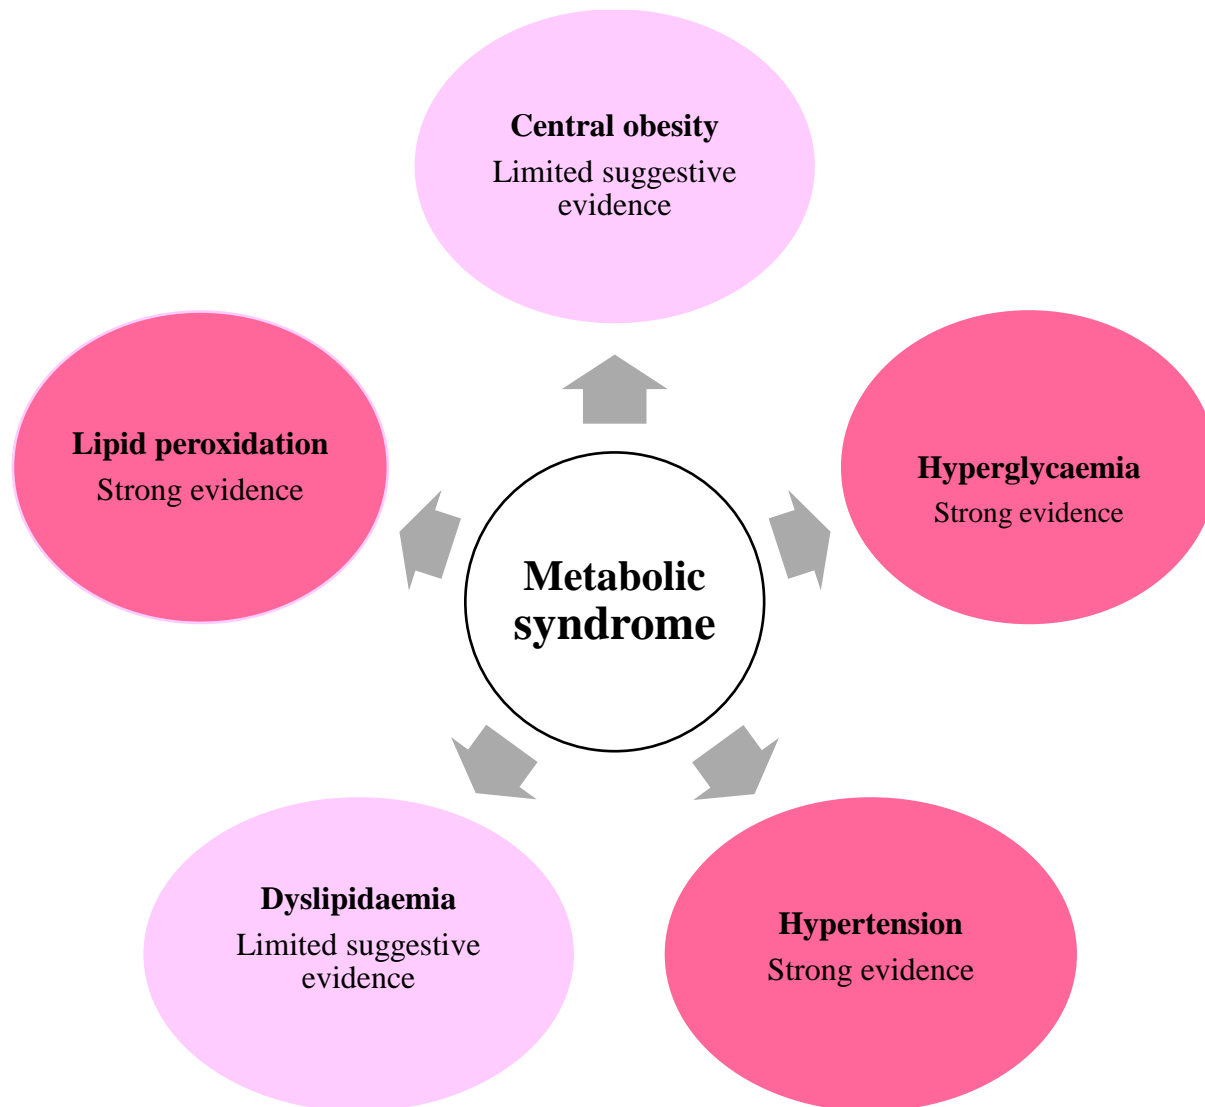

Figure 1 Influence of olive polyphenols on reducing clinical risk factors in the metabolic syndrome.
